# Supplementary material
Source: MDPI journal article supplement (https://www.mdpi.com/2227-9717/9/6/1014)
Supplement: s1 [file s1 › processes-1224826-supplementary.pdf]

# **Supplementary Materials**

## **Study of Air Flow Characteristics for Solution Blow Spinning of Polyvinylidene Fluoride Nanofibres**

**Rasheed Atif <sup>1</sup>, Madeleine Combrinck <sup>2</sup>, Jibran Khaliq <sup>2</sup>, James Martin <sup>2</sup>, Ahmed H. Hassanin <sup>3,4</sup>, Nader Shehata <sup>4,5,6,7</sup>, Eman Elnabawy <sup>3</sup>, and Islam Shyha <sup>1,\*</sup>**

1 Mechanical Engineering and Design, School of Engineering and the Built Environment, Edinburgh Napier University, Merchiston Campus, EH10 5DT, UK; A.Rasheed@napier.ac.uk

2 Department of Mechanical and Construction Engineering, Faculty of Engineering and Environment, Northumbria University, Newcastle upon Tyne, NE1 8ST, UK; madeleine.combrinck@northumbria.ac.uk

3 Centre of Smart Nanotechnology and Photonics (CSNP), SmartCI Research Centre, Alexandria University, Alexandria 21544, Egypt; ahassan@ncsu.edu

4 Department of Textile Engineering, Faculty of Engineering, Alexandria University, Alexandria 21544, Egypt.

5 Department of Engineering Mathematics and Physics, Faculty of Engineering, Alexandria University, Alexandria 21544, Egypt; nader83@vt.edu

6 USTAR Bioinnovations Centre, Faculty of Science, Utah State University, Logan, Utah 84341, United States.

7 Kuwait College of Science and Technology (KCST), Doha District 13133, Kuwait. \*  
Correspondence: I.Shyha@napier.ac.uk; Tel.: +44 (0) 131 455 2624

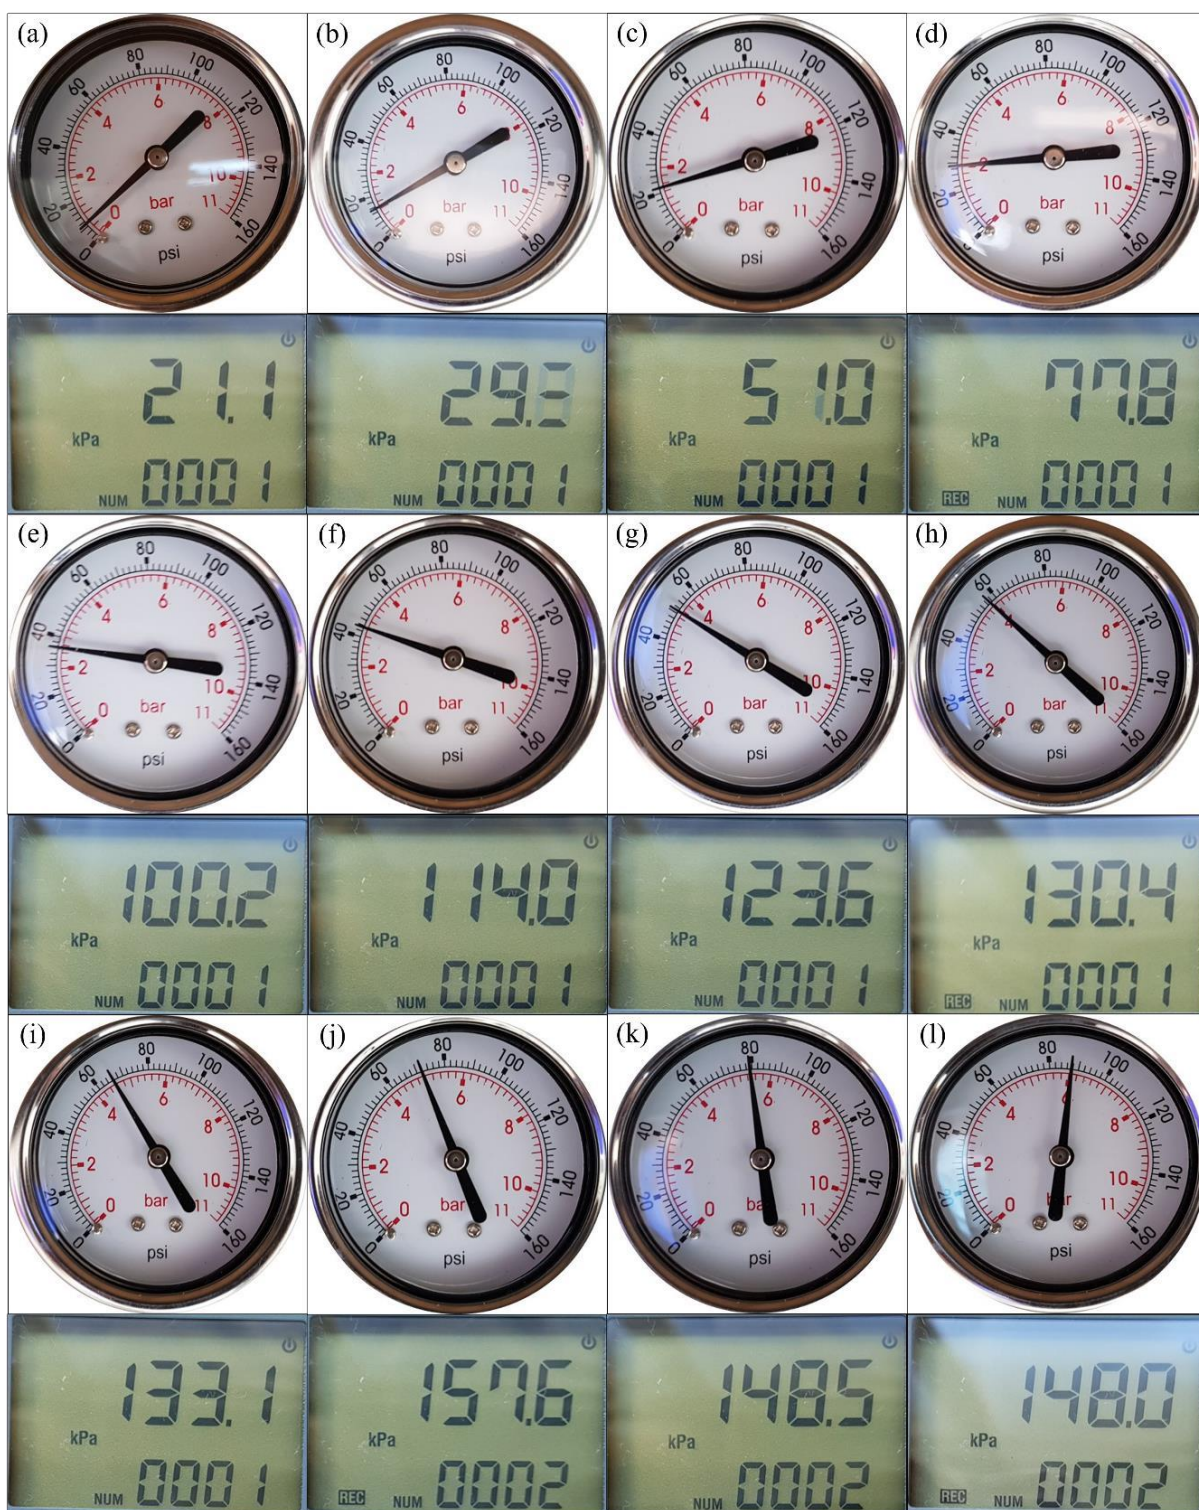

**Figure S1: (a-l) Air compressor dial gauge readings showing the input pressure values and the corresponding manometer output dynamic pressure values are shown immediately below.**

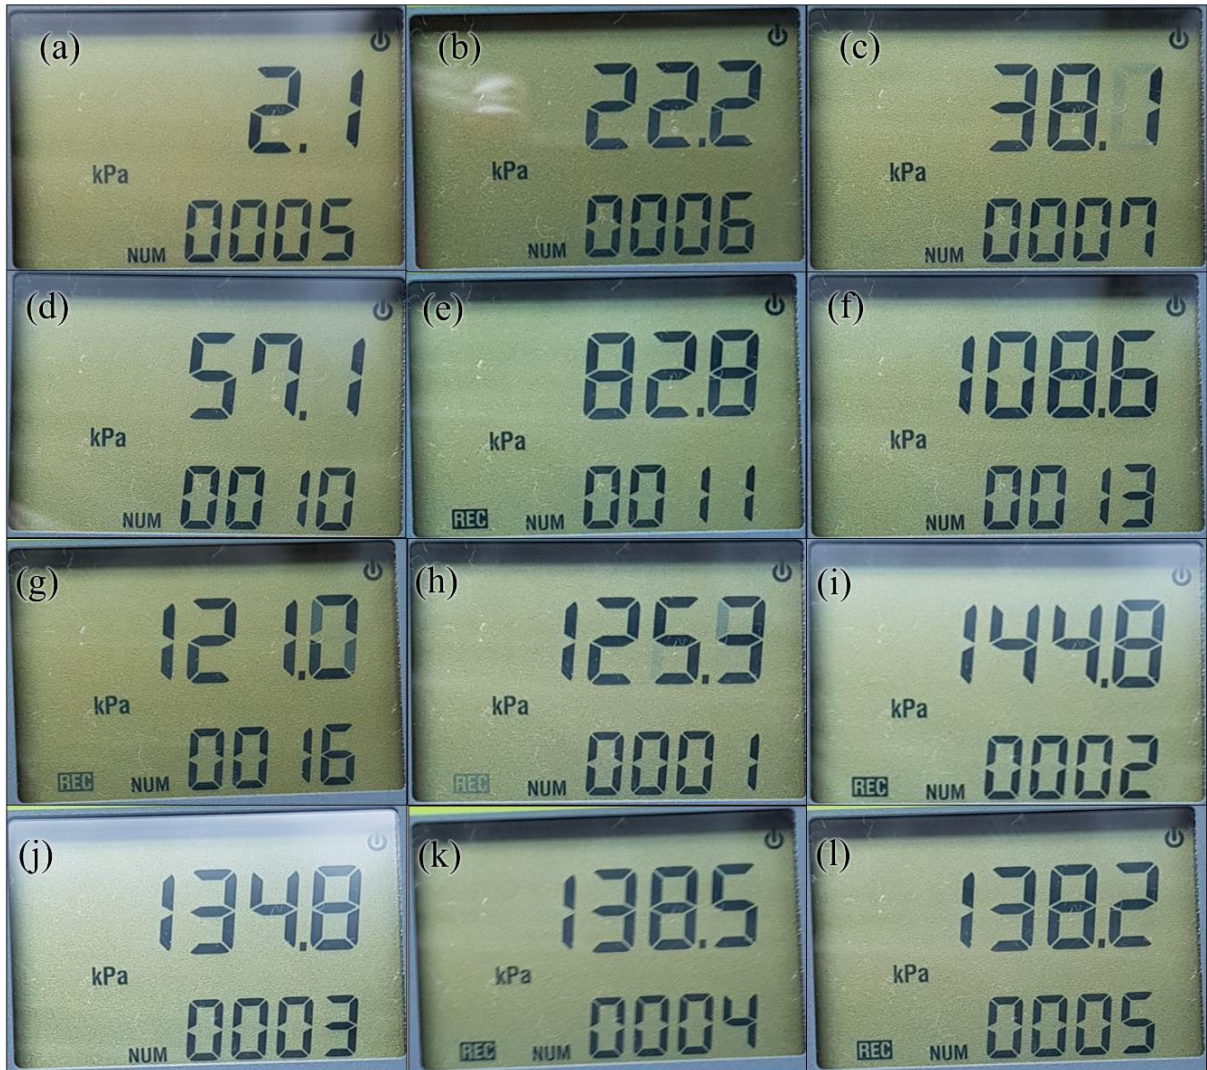

**Figure S2: (a-l) Manometer readings when pitot tube was placed at a distance of 0 mm from the nozzle end along the centreline.**

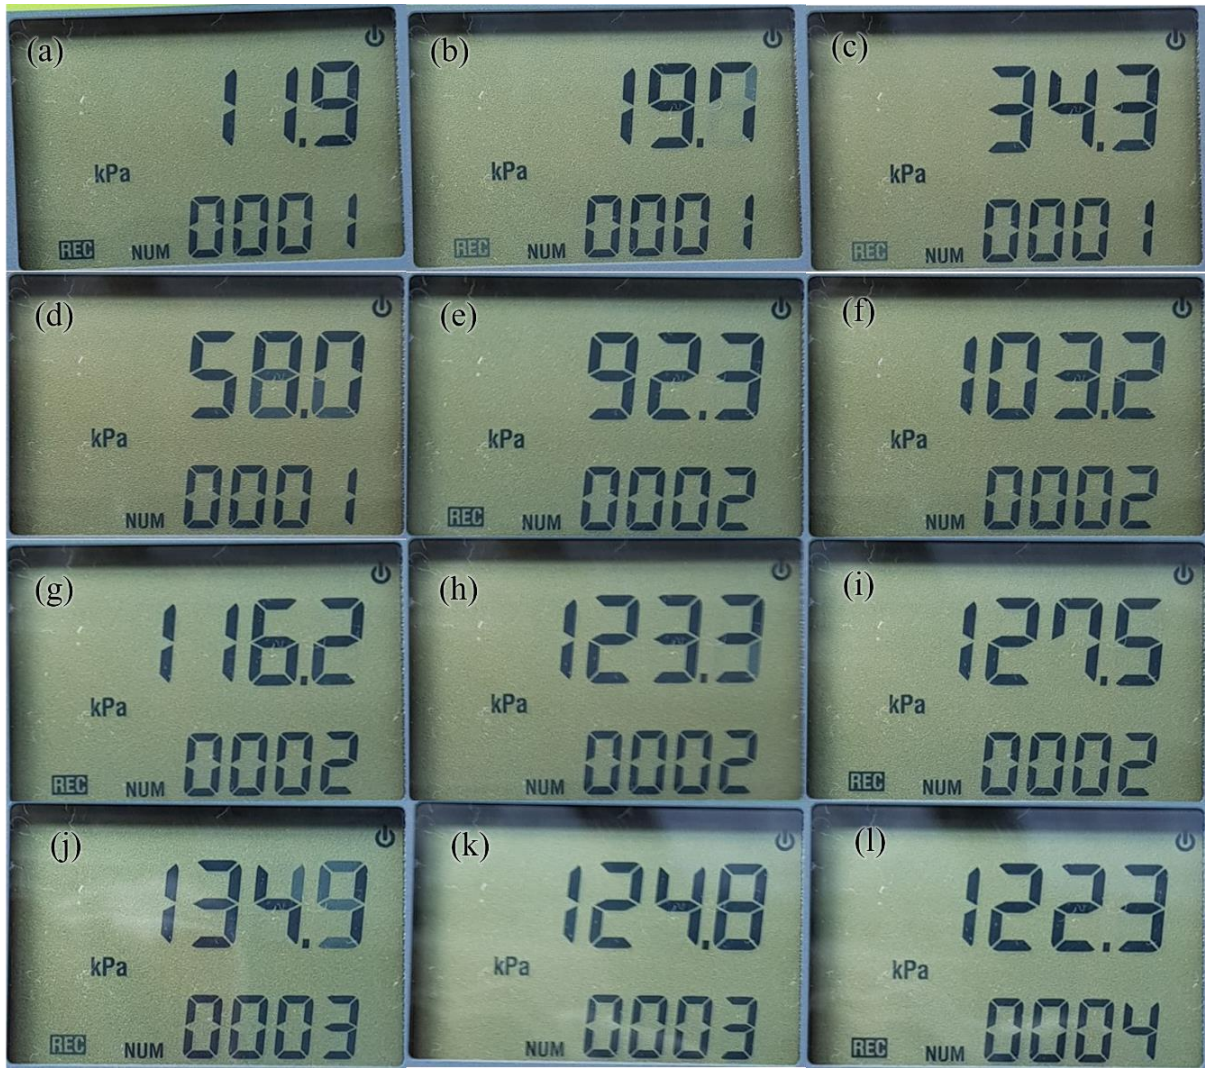

Figure S3: (a-l) Manometer readings when pitot tube was placed at a distance of 1 mm from the nozzle end along the centreline.

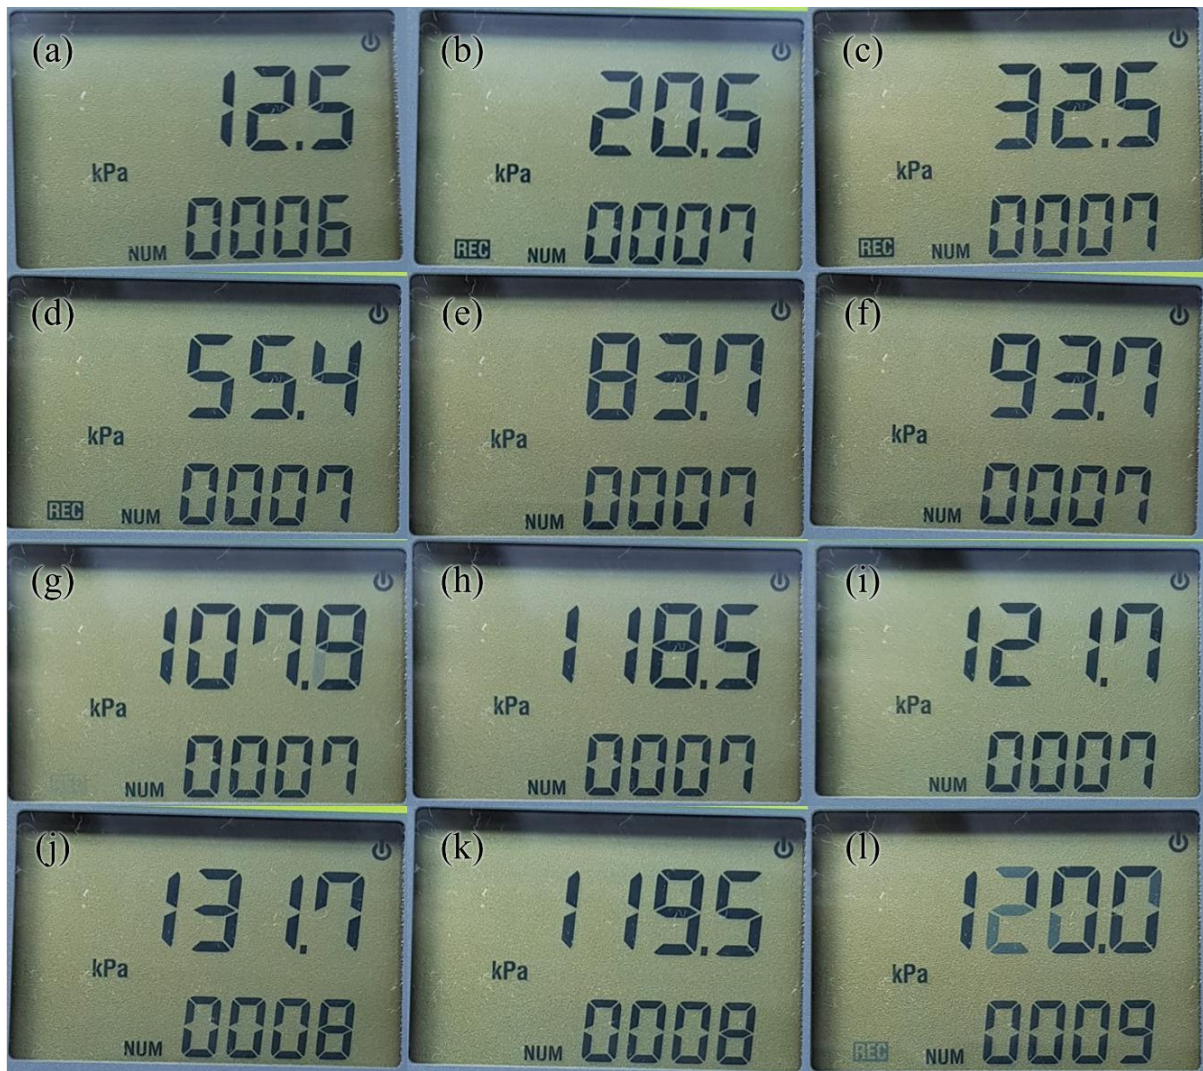

Figure S4: (a-l) Manometer readings when pitot tube was placed at a distance of 2 mm from the nozzle end along the centreline.

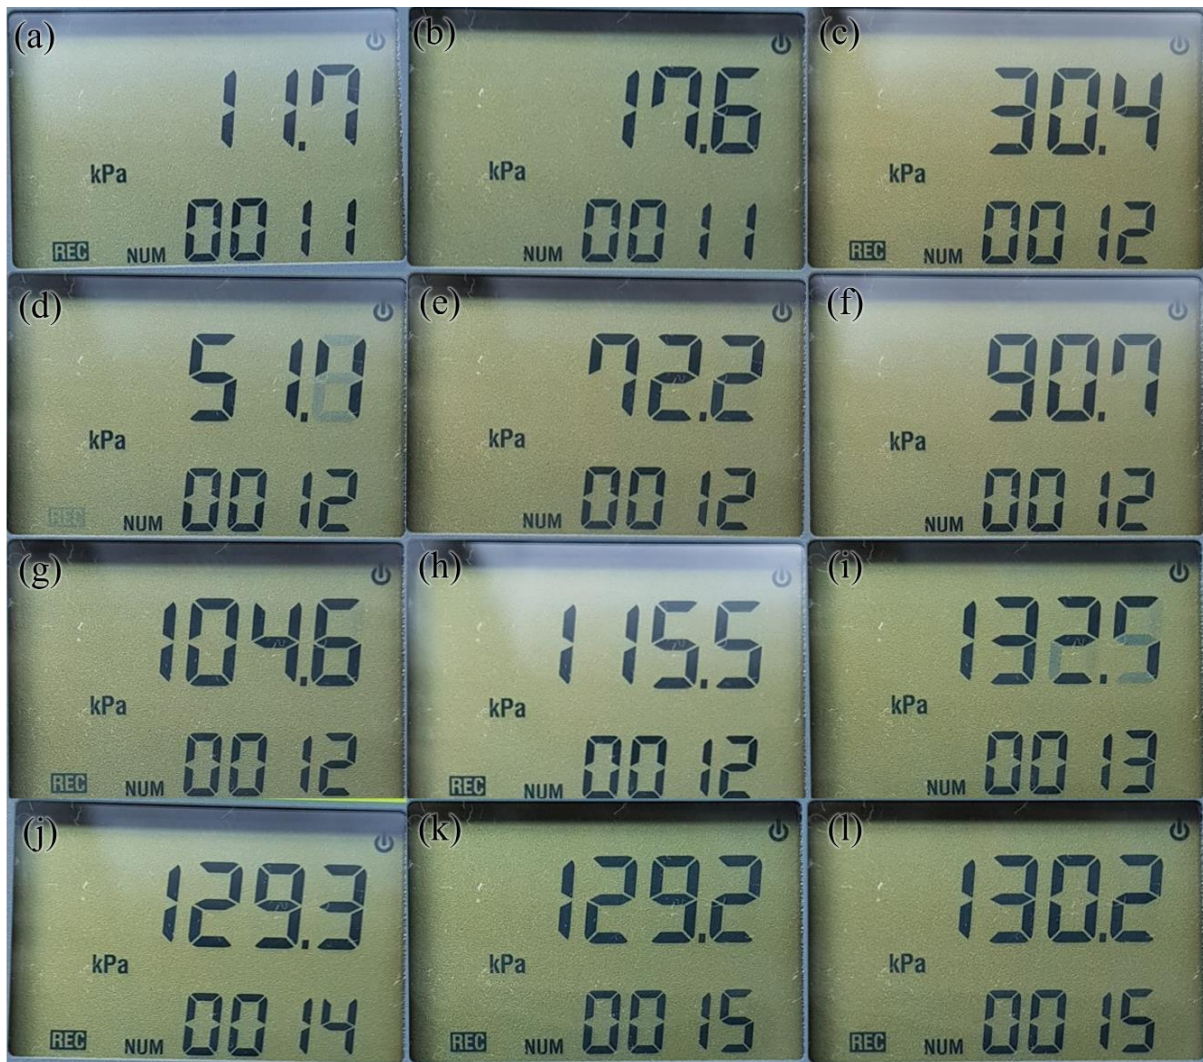

Figure S5: (a-l) Manometer readings when pitot tube was placed at a distance of 3 mm from the nozzle end along the centreline.

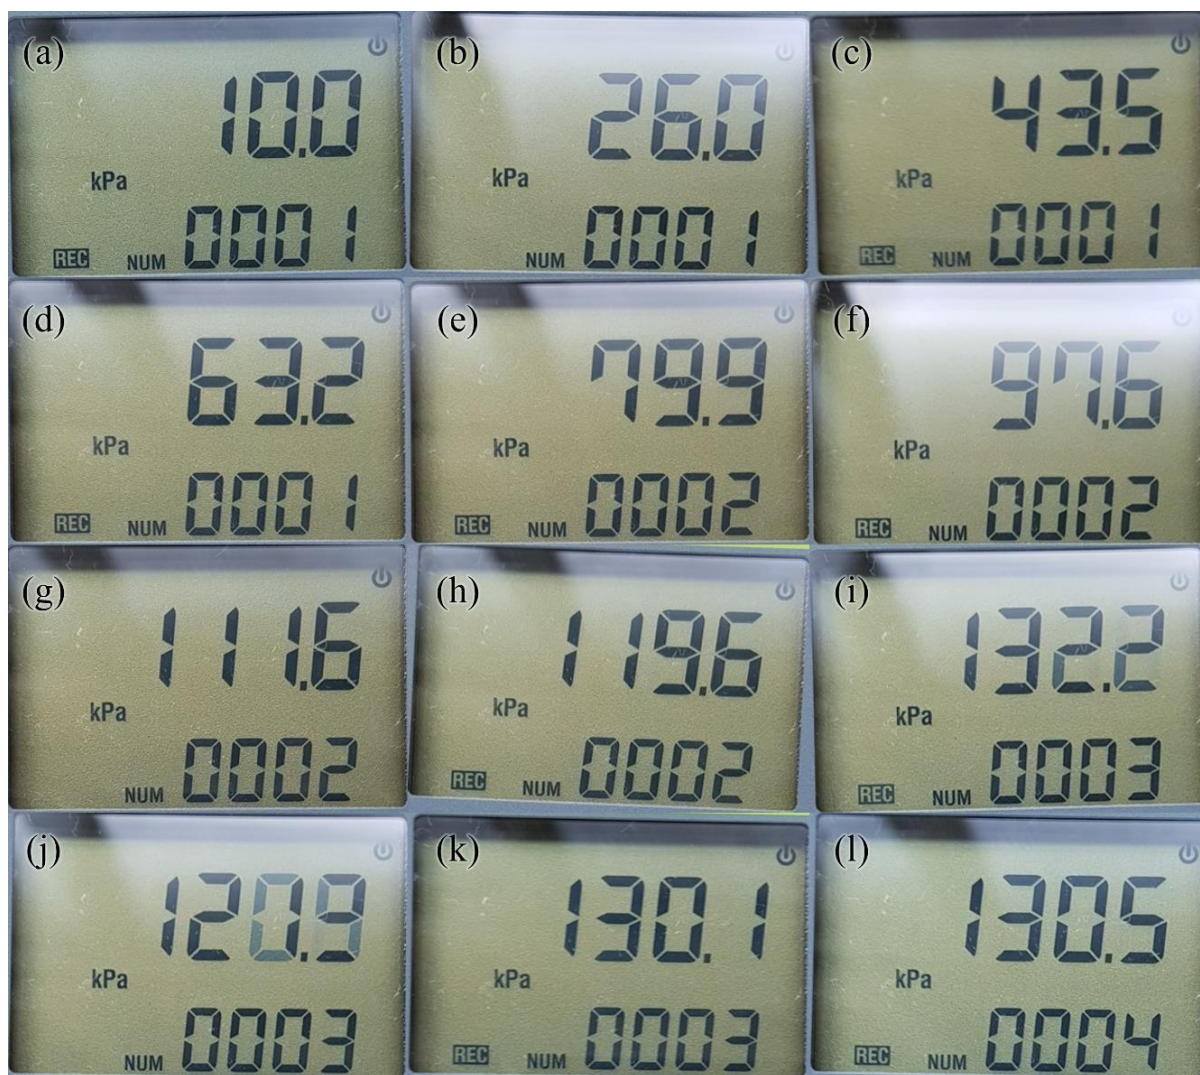

Figure S6: (a-l) Manometer readings when pitot tube was placed at a distance of 5 mm from the nozzle end along the centreline.

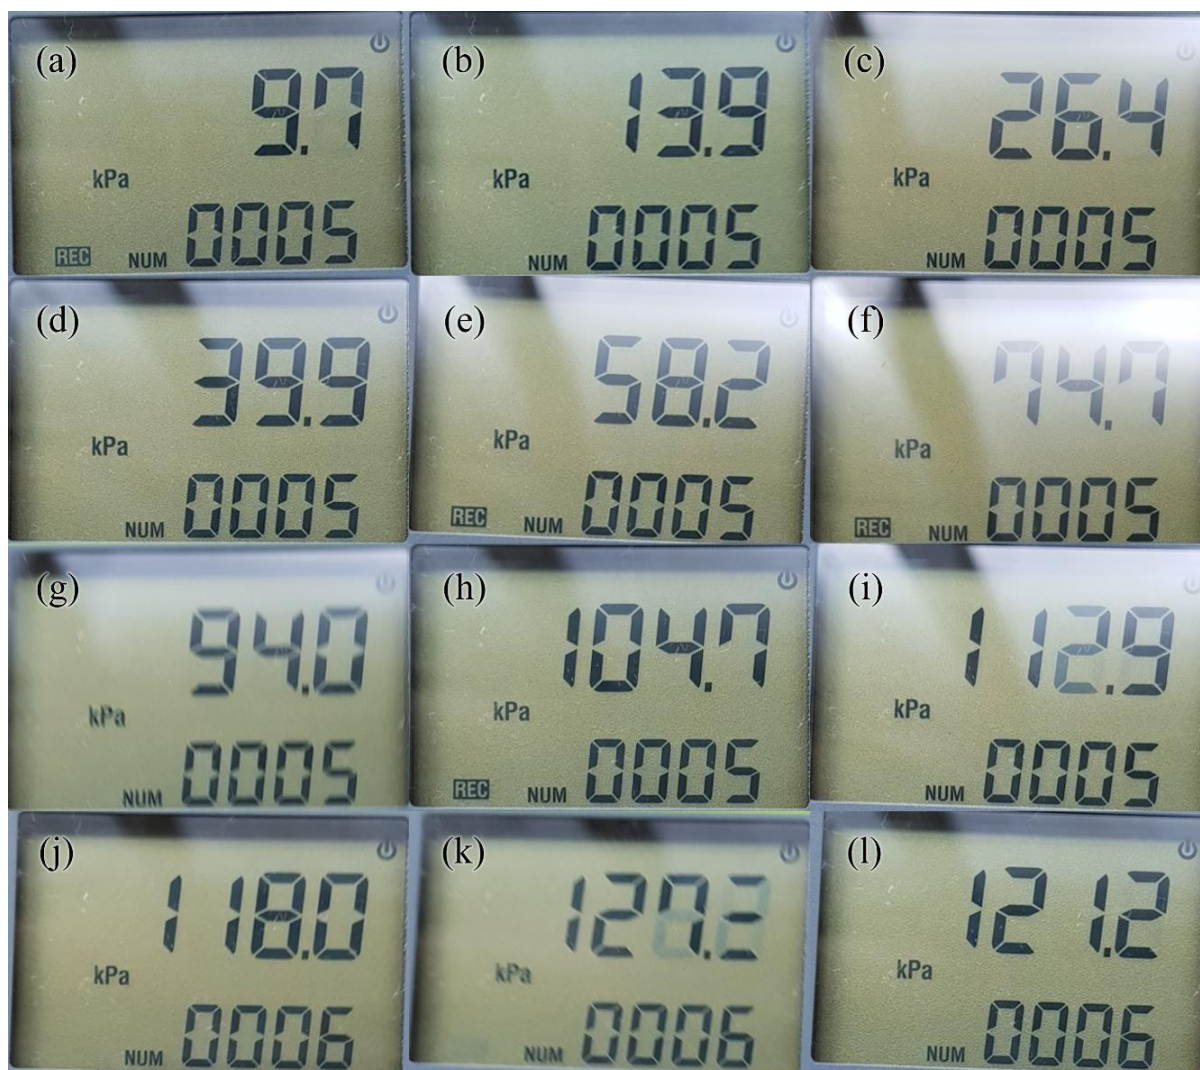

Figure S7: (a-l) Manometer readings when pitot tube was placed at a distance of 10 mm from the nozzle end along the centreline.

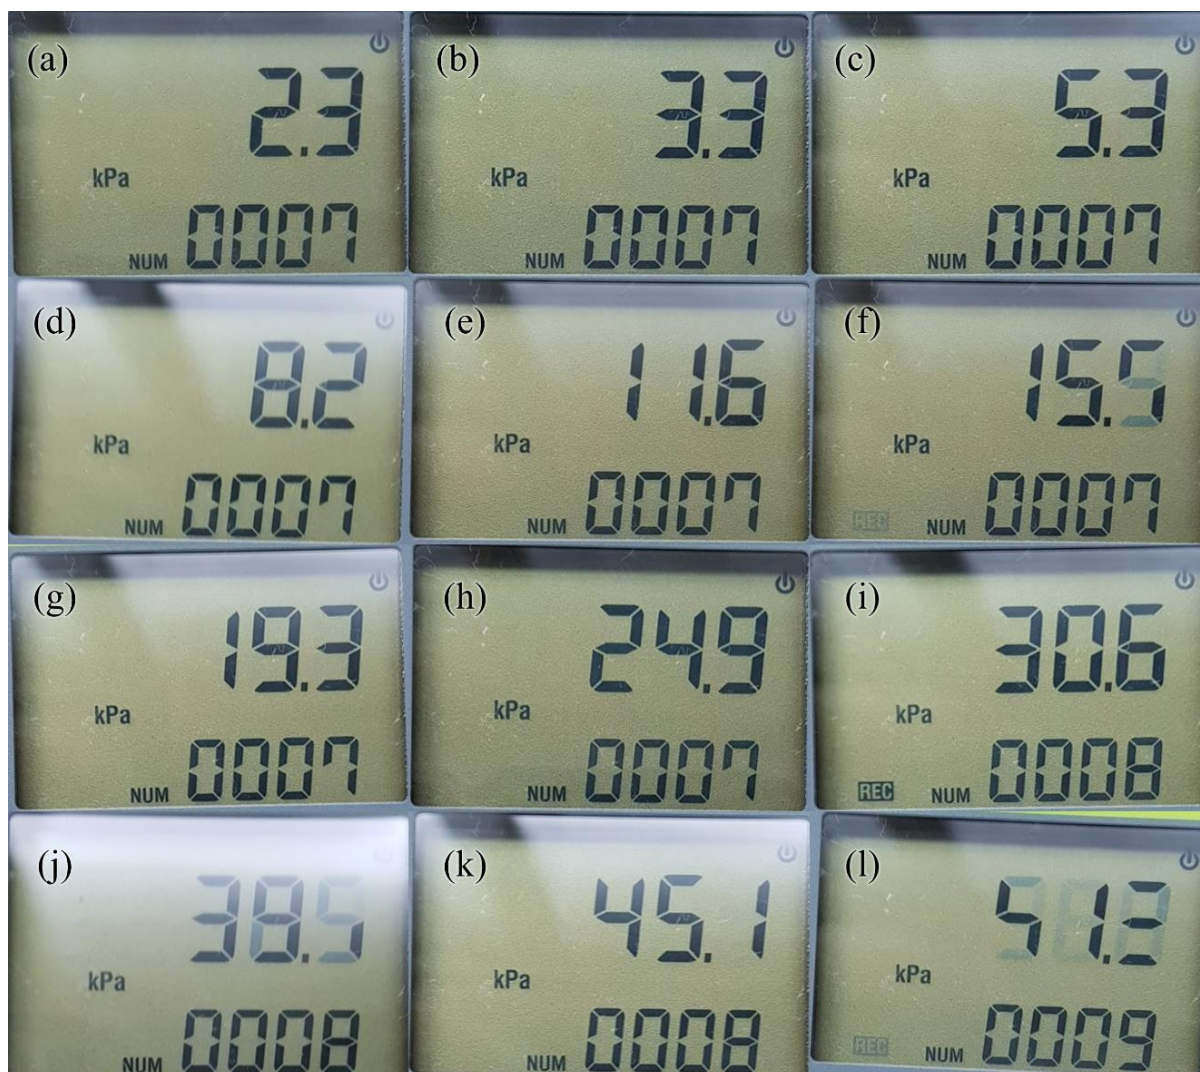

Figure S8: (a-l) Manometer readings when pitot tube was placed at a distance of 20 mm from the nozzle end along the centreline.

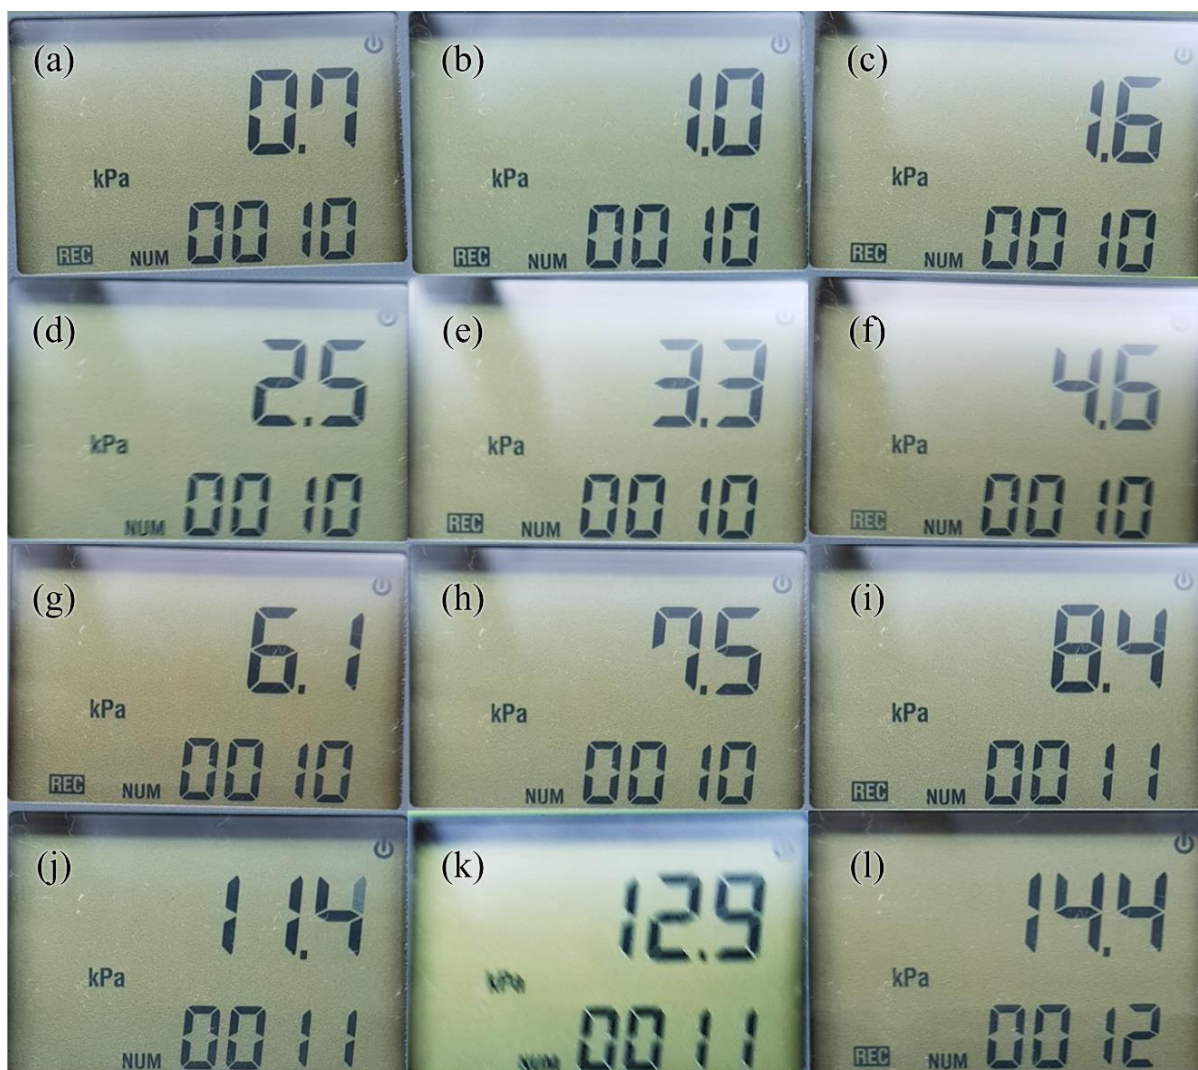

Figure S9: (a-l) Manometer readings when pitot tube was placed at a distance of 30 mm from the nozzle end along the centreline.
